# Supplementary material
Source: publisher site journal article supplement (https://www.dovepress.com/article/448091)
Supplement: Supplementary file 1 [file get_supplementary_file.php]

Supplementary Table S1: Details of volunteers.

| Number | Gender | Age (years) | Comorbidity | Infection | leukocyte (109/L) | Neutrophil percentage (%) |
| --- | --- | --- | --- | --- | --- | --- |
| 1 | Male | 24 | None | None | 6.3 | 55.6 |
| 2 | Female | 27 | None | None | 3.7 | 47.7 |
| 3 | Female | 26 | None | None | 6.1 | 52.0 |
| 4 | Male | 23 | None | None | 9.5 | 59.2 |
| 5 | Male | 35 | None | None | 4.5 | 66.1 |
| 6 | Male | 30 | None | None | 5.3 | 54.3 |
| 7 | Female | 33 | None | None | 8.0 | 48.4 |
| 8 | Female | 24 | None | None | 5.3 | 51.6 |
| 9 | Male | 28 | None | None | 4.9 | 60.1 |
| 10 | Male | 24 | None | None | 7.9 | 58.7 |
| 11 | Female | 27 | None | None | 7.7 | 55.7 |
| 12 | Male | 23 | None | None | 6.3 | 61.8 |
| 13 | Female | 28 | None | None | 4.4 | 64.8 |
| 14 | Female | 24 | None | None | 3.8 | 48.1 |
| 15 | Female | 35 | None | None | 7.5 | 69.5 |
| 16 | Female | 27 | None | None | 6.4 | 66.3 |
| 17 | Male | 31 | None | None | 3.6 | 52.2 |

Supplementary Table S2: Primer sequences for RT-qPCR.

| Genes | Forward (5’-3’) | Reverse (5’-3’) |
| --- | --- | --- |
| BAP31 | GCGGAGGTCTTTGTTGTGTT | CCTGCTGCGAAATGAGAGTC |
| IL-1β | TGACGGACCCCAAAAGATGA | TCTCCACAGCCACAATGAGT |
| TNF-α | CCCTCACACTCAGATCATCTTCT | GCTACGACGTGGGCTACAG |
| IL-10 | GATGCCTTCAGCAGAGTGAA | GCAACCCAGGTAACCCTTAAA |
| TGF-β | CAATTCCTGGCGATACCTCAG | GCACAACTCCGGTGACATCAA |
| β-actin | CCTTCCTGGGCATGGAGTCCTG | GGAGCAATGATCTTGATCTTC |


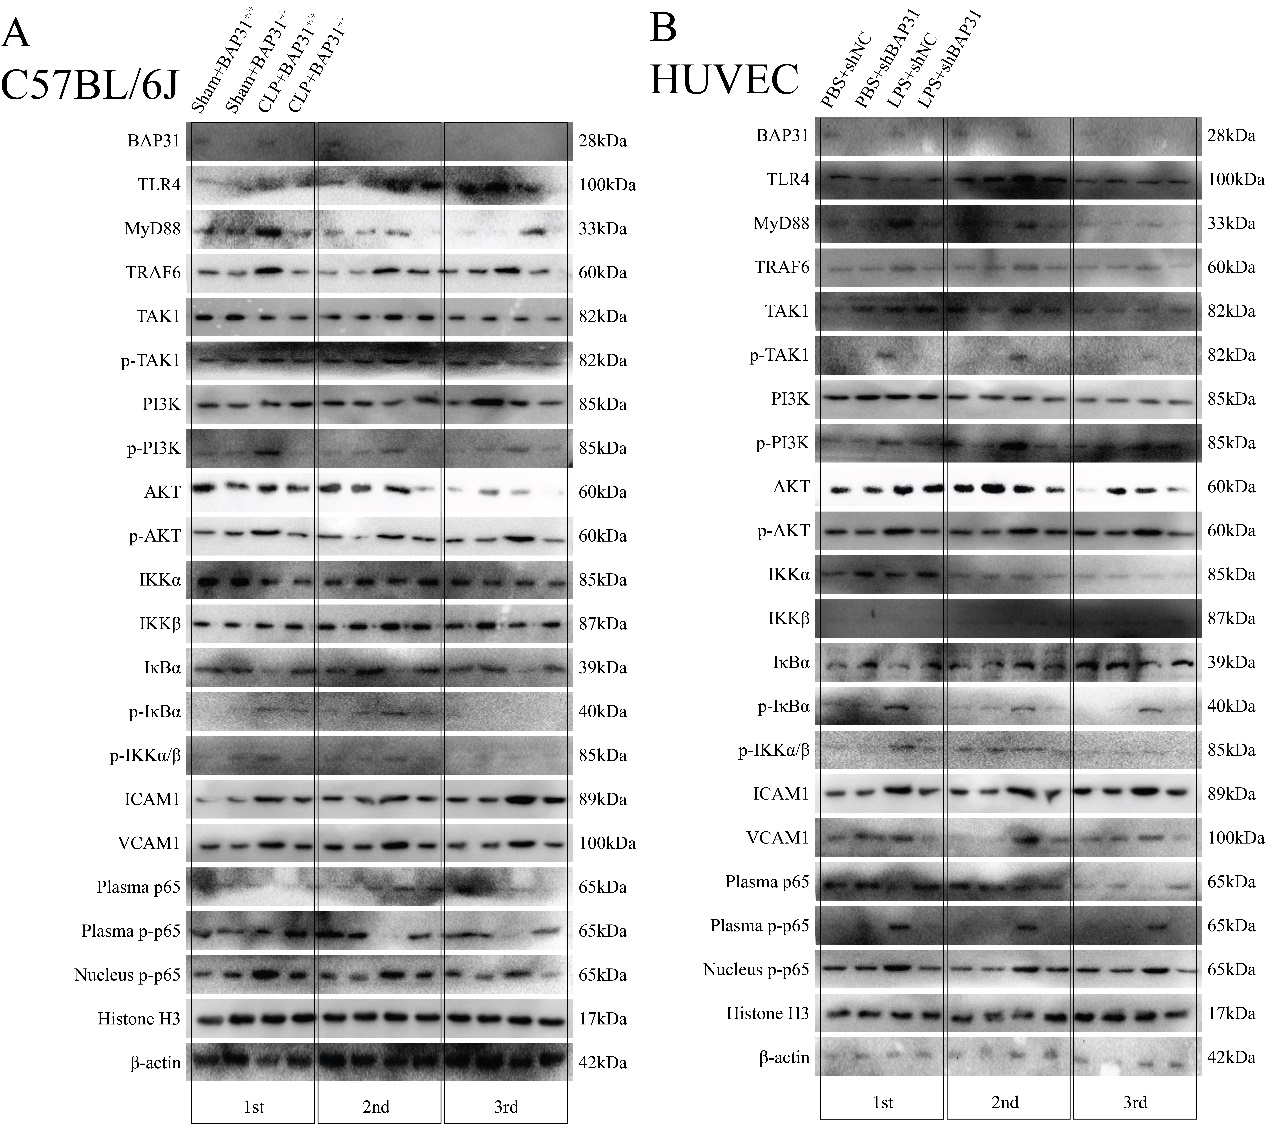


Supplementary Figure S1: Repetition of WB images (A: C57BL/6J, B: HUVEC).
